# Supplementary material for: Alkylative damage of mRNA leads to ribosome stalling and rescue by trans translation in bacteria
Source: eLife journal article supplement (doi:10.7554/elife.61984), 2020-09-17
Supplement: supp [file elife-61984-supp-v1.zip]

Archive with 17 entries (17 files):
- elife_poa_e61984_Transparent_Reporting_File.pdf
- elife_poa_e61984_Figure_1_figure_supplement_1.ai
- elife_poa_e61984_Figure_5_figure_supplement_1.ai
- elife_poa_e61984_Figure_5_figure_supplement_2.ai
- elife_poa_e61984_Figure_5_figure_supplement_3.ai
- elife_poa_e61984_Figure_5_figure_supplement_4.ai
- elife_poa_e61984_Figure_5_figure_supplement_5.ai
- elife_poa_e61984_Figure_5_figure_supplement_6.ai
- elife_poa_e61984_Figure_6_figure_supplement_1.ai
- elife_poa_e61984_Supplementary_file_1.xlsx
- elife_poa_e61984_Figure_1_source_data_1.xlsx
- elife_poa_e61984_Figure_1_figure_supplement_1_source_data_1.xlsx
- elife_poa_e61984_Figure_2_source_data_1.xlsx
- elife_poa_e61984_Figure_3_source_data_1.xlsx
- elife_poa_e61984_Figure_5_source_data_1.xlsx
- elife_poa_e61984_Figure_5_figure_supplement_1_source_data_1.xlsx
- elife_poa_e61984_Figure_7_source_data_1.xlsx
