# Supplementary material for: Alkylative damage of mRNA leads to ribosome stalling and rescue by trans translation in bacteria
Source: eLife journal article supplement (doi:10.7554/elife.61984), 2020-09-17
Supplement: supp [file elife-61984-supp-v1.zip › elife_poa_e61984_Figure_1_figure_supplement_1_source_data_1.xlsx]

## Sheet: Sheet1
C
	2.5	19.61
	10	78.96
	25	197.42
	50	383.8
	100	764.43
A
	2.5	53.33
	10	211.3
	25	525.34
	50	1044.25
	100	2077.05
G
	2.5	47.8
	10	189.31
	25	472.07
	50	938.09
	100	1866.93
m1A
	2.5	303
	25	2506
	250	3381
	2500	22435
	25000	210856
	250000	1568945
m1G
	250	85
	2500	721
	25000	7201
	250000	68903
m3C
	250	3192
	2500	7969
	25000	36682
	250000	339780
m6A
	250	197
	2500	1371
	25000	12724
	250000	125877
m6G
	2500	205
	25000	1901
	250000	18024
