# Supplementary material for: Alkylative damage of mRNA leads to ribosome stalling and rescue by trans translation in bacteria
Source: eLife journal article supplement (doi:10.7554/elife.61984), 2020-09-17
Supplement: supp [file elife-61984-supp-v1.zip › elife_poa_e61984_Figure_1_source_data_1.xlsx]

## Sheet: Figure 1 - Source Data 1
m6A
	NT	MMS	MNNG
	7648.34	5073.7	4724.16
	6071.87	4889.22	4538.24
	5416.52	4735.64	4454.47
m1G
	NT	MMS	MNNG
	1089.2	1369.35	1426.61
	1387.67	1382.58	1442.35
	1414.47	1477.84	1467.5
m7G
	NT	MMS	MNNG
	32855.9	41707.6	82331
	42846	57205.9	61442.3
	53991.8	46201.6	52041.7
m1A
	NT	MMS	MNNG
	6.06819	560.195	155.547
	6.28777	543.783	166.869
	3.12828	581.955	175.778
m3C
	NT	MMS	MNNG
	20.882	559.159	345.962
	27.2633	791.391	287.398
	24.9535	472.999	396.831
m6G
	NT	MMS	MNNG
	65.3533	108.029	974.34
	73.4295	85.5125	984.993
	80.1766	107.261	1003.32
