# Supplementary material for: Alkylative damage of mRNA leads to ribosome stalling and rescue by trans translation in bacteria
Source: eLife journal article supplement (doi:10.7554/elife.61984), 2020-09-17
Supplement: supp [file elife-61984-supp-v1.zip › elife_poa_e61984_Figure_2_source_data_1.xlsx]

## Sheet: Sheet1
Time (s)	Control	m1A
0.0028	0.035049
0.005	0.0724443
0.01	0.363617
0.015	0.534164
0.02	0.663875
0.025	0.724744
0.05	0.79611
0.075	0.793263
0.1	0.770442
0.25	0.774776
1		0.0220329
2		0.0307974
3		0.0500193
5		0.0625371
7		0.0746907
10		0.0809024
15		0.116209
21		0.118737
30		0.122016
45		0.124742
60		0.128885
