# Supplementary material for: Alkylative damage of mRNA leads to ribosome stalling and rescue by trans translation in bacteria
Source: eLife journal article supplement (doi:10.7554/elife.61984), 2020-09-17
Supplement: supp [file elife-61984-supp-v1.zip › elife_poa_e61984_Figure_3_source_data_1.xlsx]

## Sheet: Sheet1
Time (s)	No Paromo	Paromo
1	0.0616303	0.0531905
2		0.0717461
4	0.0629174	0.0713066
8	0.0929856	0.100495
10	0.0797011	0.123946
15	0.113037	0.192916
30	0.125926	0.181233
60	0.12521	0.171394
120	0.13457	0.155917
