# Supplementary material for: Alkylative damage of mRNA leads to ribosome stalling and rescue by trans translation in bacteria
Source: eLife journal article supplement (doi:10.7554/elife.61984), 2020-09-17
Supplement: supp [file elife-61984-supp-v1.zip › elife_poa_e61984_Figure_5_figure_supplement_1_source_data_1.xlsx]

## Sheet: Sheet1
0.1% MMS		MG1655			MG1655ΔssrA
	NT	72500000	65000000	57500000	65000000	60000000	42500000
	20 min	70000000	57500000	45000000	50000000	75000000	60000000
	40 min	67500000	72500000	62500000	57500000	82500000	52500000
	60 min	52500000	65000000	65000000	45000000	50000000	57500000
0.5% MMS		MG1655			MG1655ΔssrA
	NT	55000000	62500000	57500000	37500000	62500000	62500000
	20 min	65000000	37500000	42500000	32500000	50000000	45000000
	40 min	4250000	3000000	6750000	3000000	4500000	7750000
	60 min	27500	0	40000	12500	0	40000
0.1% MMS		X90			X90ΔssrA
	NT	87500000	92500000	92500000	85000000	72500000	72500000
	20 min	92500000	95000000	82500000	75000000	67500000	107500000
	40 min	92500000	90000000	105000000	92500000	92500000	90000000
	60 min	70000000	107500000	95000000	72500000	87500000	92500000
0.5% MMS		X90			X90ΔssrA
	NT	127500000	95000000	97500000	95000000	110000000	97500000
	20 min	30000000	42500000	42500000	37500000	30000000	27500000
	40 min	2750000	3000000	2500000	4500000	1400000	925000
	60 min	55000	17500	5000	40000	2500	2500
