# Supplementary material for: Alkylative damage of mRNA leads to ribosome stalling and rescue by trans translation in bacteria
Source: eLife journal article supplement (doi:10.7554/elife.61984), 2020-09-17
Supplement: supp [file elife-61984-supp-v1.zip › elife_poa_e61984_Figure_5_source_data_1.xlsx]

## Sheet: Sheet1
Fold-increase of HIs6 with Rif treatment
	2.94925	2.65399	2.25699
	1.91013	2.24729	3.0016
	2.1643	1.67178	2.20425
Percent-decrease in His6 with Rif treatment
	15.8287	21.4248	36.2419
	10.1692	14.1189	39.9919
	11.5187	23.6544	36.0845
