# Supplementary material for: Alkylative damage of mRNA leads to ribosome stalling and rescue by trans translation in bacteria
Source: eLife journal article supplement (doi:10.7554/elife.61984), 2020-09-17
Supplement: supp [file elife-61984-supp-v1.zip › elife_poa_e61984_Figure_7_source_data_1.xlsx]

## Sheet: No Treatment
time	ΔssrA NT			WT NT
0.118	0.132333	0.128333	0.135	0.130333	0.124333	0.126667
0.284	0.143667	0.139333	0.145	0.142667	0.137	0.139667
0.451	0.159667	0.154	0.158667	0.162667	0.155333	0.158667
0.618	0.181333	0.175	0.177667	0.184	0.177333	0.181333
0.784	0.200333	0.193667	0.196667	0.204333	0.197	0.200667
0.951	0.221667	0.214333	0.217	0.230667	0.221667	0.226
1.118	0.246333	0.239	0.240667	0.255	0.247	0.25
1.284	0.263667	0.256333	0.26	0.277667	0.269333	0.273333
1.451	0.288333	0.279667	0.282667	0.306667	0.298	0.300333
1.618	0.319667	0.308	0.312	0.340333	0.332667	0.333667
1.784	0.353667	0.341	0.341667	0.363333	0.357	0.356
1.951	0.381	0.366	0.376	0.383333	0.377667	0.375333
2.118	0.401	0.384333	0.397333	0.397667	0.392667	0.388333
2.284	0.420667	0.401	0.419667	0.411667	0.41	0.405333
2.451	0.44	0.418667	0.437667	0.431	0.427333	0.424
2.618	0.459667	0.441333	0.454667	0.447333	0.443333	0.440333
2.784	0.476333	0.457667	0.474667	0.462667	0.458667	0.456
2.951	0.491667	0.472333	0.490667	0.477	0.473667	0.471
3.118	0.505333	0.486333	0.505333	0.492333	0.489	0.484667
3.284	0.519	0.499667	0.519667	0.508	0.503333	0.498333
3.451	0.532667	0.513	0.535	0.522333	0.521	0.511667
3.618	0.546667	0.525	0.549667	0.536333	0.530333	0.524
3.784	0.560667	0.536333	0.563667	0.548667	0.543333	0.535333
3.951	0.574	0.549333	0.578667	0.560333	0.553333	0.546333
4.118	0.587	0.561333	0.592667	0.571333	0.564667	0.557667
4.284	0.601	0.573667	0.607	0.582667	0.576333	0.569
4.451	0.613333	0.586667	0.62	0.592333	0.586	0.579
4.618	0.627	0.598	0.632667	0.602333	0.598	0.591667
4.784	0.639	0.610667	0.645667	0.614667	0.609667	0.603
4.951	0.652333	0.622333	0.658667	0.625667	0.621	0.615
5.118	0.663667	0.634	0.671	0.636667	0.632	0.626
5.284	0.675	0.645667	0.682	0.648	0.643	0.637333
5.451	0.687	0.656	0.693333	0.659333	0.653667	0.647333
5.618	0.698	0.667	0.704	0.67	0.664667	0.657667
5.784	0.708333	0.677667	0.715	0.679333	0.675	0.668
5.951	0.719333	0.688	0.725333	0.689667	0.684333	0.677667
6.118	0.728667	0.697667	0.734333	0.698667	0.694333	0.685333
6.284	0.739	0.707	0.743	0.707667	0.701667	0.695667
6.451	0.748	0.716333	0.750667	0.714333	0.709	0.703
6.618	0.755667	0.725	0.758667	0.722	0.715	0.709
6.784	0.762	0.731667	0.765667	0.729333	0.721667	0.715667
6.951	0.768667	0.738	0.772667	0.734333	0.728333	0.722
7.118	0.774	0.744333	0.778	0.741	0.735333	0.728333
7.284	0.779667	0.75	0.783333	0.747	0.740667	0.734
7.451	0.785	0.755	0.788	0.753667	0.746333	0.738333
7.618	0.79	0.76	0.792667	0.758667	0.752667	0.743
7.784	0.794333	0.765	0.796667	0.763667	0.754	0.747333
7.951	0.799	0.769333	0.800667	0.767667	0.758333	0.751333
8.118	0.803	0.773333	0.804	0.773	0.762	0.754667
8.284	0.808	0.777	0.807667	0.775667	0.764333	0.756667
8.451	0.811	0.781333	0.811333	0.779	0.769667	0.758
8.618	0.812667	0.784333	0.812333	0.782	0.768	0.760667
8.784	0.813333	0.787	0.811333	0.784667	0.769333	0.761667
8.951	0.814667	0.789667	0.808667	0.785333	0.771	0.761667
9.118	0.813667	0.792667	0.807333	0.787	0.772	0.761333
9.284	0.812	0.792667	0.806	0.788	0.772667	0.761333
9.451	0.809	0.790333	0.804	0.789333	0.772667	0.762
9.618	0.806333	0.786333	0.801333	0.790333	0.777	0.761333
9.784	0.803667	0.783667	0.798667	0.793667	0.777	0.76
9.951	0.801	0.781333	0.796667	0.796333	0.777	0.759
10.118	0.798667	0.778333	0.794667	0.795667	0.775333	0.758
10.284	0.796667	0.775333	0.792333	0.794	0.775	0.757
10.451	0.794333	0.772667	0.789667	0.793333	0.771333	0.757
10.618	0.791667	0.769333	0.787333	0.790667	0.769	0.755
10.784	0.789	0.768	0.784333	0.788333	0.766	0.753333
10.951	0.786333	0.764667	0.782333	0.786667	0.765333	0.751
11.118	0.784	0.761	0.779333	0.784	0.762	0.749667
11.284	0.780667	0.759	0.778	0.781333	0.760333	0.748
11.451	0.778333	0.755667	0.775333	0.780333	0.757667	0.745
11.618	0.775333	0.753	0.772667	0.777	0.755667	0.743333
11.784	0.772667	0.750333	0.770333	0.775333	0.753667	0.741
11.951	0.77	0.747333	0.768667	0.773333	0.752	0.739
12.118	0.767667	0.744667	0.766	0.771	0.75	0.736667
12.284	0.765667	0.742333	0.763667	0.768333	0.746	0.734
12.451	0.762667	0.739333	0.761333	0.766	0.744333	0.731667
12.618	0.759667	0.736333	0.759	0.763667	0.742333	0.729667
12.784	0.757667	0.733667	0.756333	0.761	0.739	0.727
12.951	0.754333	0.731	0.754	0.758333	0.736667	0.725

## Sheet: MMS
time	ΔssrA MMS			WT MMS
0.118	0.101667	0.106333	0.105667	0.105333	0.102667	0.104
0.284	0.102	0.107	0.106	0.108333	0.105333	0.106667
0.451	0.102667	0.108	0.107	0.113667	0.109667	0.110333
0.618	0.102667	0.11	0.108667	0.121333	0.115333	0.115333
0.784	0.103667	0.112667	0.11	0.13	0.123	0.122333
0.951	0.104667	0.115667	0.112667	0.142	0.132667	0.131333
1.118	0.106333	0.12	0.116	0.157333	0.145667	0.142333
1.284	0.108	0.125	0.119333	0.173667	0.16	0.155667
1.451	0.110333	0.131333	0.124333	0.189667	0.177	0.17
1.618	0.113333	0.14	0.131	0.206667	0.190667	0.185667
1.784	0.116667	0.149333	0.139	0.227333	0.208667	0.2
1.951	0.121	0.163	0.149	0.251333	0.231667	0.218667
2.118	0.126667	0.176333	0.160667	0.274	0.251	0.238
2.284	0.133333	0.188667	0.173667	0.300333	0.274	0.257667
2.451	0.141	0.200667	0.184	0.33	0.296333	0.279
2.618	0.151	0.217	0.197	0.353333	0.323	0.301333
2.784	0.161667	0.238333	0.212333	0.370333	0.341	0.327667
2.951	0.172	0.253333	0.232667	0.389333	0.359	0.343333
3.118	0.182	0.267667	0.247333	0.408667	0.378667	0.360333
3.284	0.192	0.286333	0.261667	0.424	0.394333	0.378333
3.451	0.206667	0.309333	0.282	0.440333	0.411	0.395333
3.618	0.223	0.335667	0.304333	0.453667	0.426333	0.412333
3.784	0.235	0.351667	0.329667	0.466	0.437667	0.424
3.951	0.249667	0.371333	0.349667	0.478667	0.449667	0.437
4.118	0.268	0.389333	0.364667	0.490667	0.461667	0.448333
4.284	0.289	0.404667	0.382667	0.503667	0.473667	0.460333
4.451	0.312667	0.422667	0.399	0.516	0.485333	0.471
4.618	0.334333	0.437	0.413667	0.528333	0.496333	0.481667
4.784	0.349667	0.450333	0.432	0.538667	0.507667	0.493
4.951	0.364667	0.463333	0.442333	0.550333	0.518667	0.505
5.118	0.383	0.475	0.453667	0.562333	0.528333	0.515333
5.284	0.397333	0.487	0.465	0.572667	0.539667	0.526333
5.451	0.414	0.498333	0.476	0.583333	0.549667	0.536667
5.618	0.429	0.509667	0.487333	0.593	0.558667	0.546
5.784	0.440667	0.522	0.498	0.603333	0.568333	0.555333
5.951	0.452333	0.533333	0.509667	0.612333	0.577667	0.563333
6.118	0.463	0.544667	0.521	0.622333	0.586667	0.572667
6.284	0.475333	0.555333	0.532	0.632	0.596	0.581667
6.451	0.487	0.565	0.541667	0.640333	0.604667	0.59
6.618	0.498333	0.574333	0.552333	0.649667	0.612667	0.597333
6.784	0.51	0.584333	0.562	0.657333	0.620667	0.605667
6.951	0.521333	0.594	0.572	0.666333	0.628667	0.613333
7.118	0.533667	0.603667	0.581333	0.674	0.636667	0.620333
7.284	0.544333	0.611667	0.589333	0.681667	0.643	0.626
7.451	0.555	0.619667	0.596667	0.688667	0.65	0.633
7.618	0.564667	0.628667	0.604667	0.696333	0.657	0.639333
7.784	0.574667	0.635667	0.612667	0.703333	0.664	0.645
7.951	0.584	0.643	0.619333	0.709	0.670667	0.651667
8.118	0.593333	0.650667	0.626	0.716667	0.677	0.658
8.284	0.601667	0.657333	0.632667	0.721667	0.681667	0.662
8.451	0.610333	0.664333	0.639	0.727667	0.687	0.667667
8.618	0.618333	0.669667	0.645333	0.732333	0.692	0.671333
8.784	0.627	0.678	0.651333	0.737333	0.696667	0.676667
8.951	0.635	0.683667	0.657333	0.741667	0.701333	0.681667
9.118	0.642333	0.689667	0.663333	0.745667	0.706	0.685667
9.284	0.65	0.694333	0.668333	0.749667	0.710333	0.689333
9.451	0.657	0.7	0.674	0.753	0.715333	0.693
9.618	0.665	0.704	0.677667	0.755667	0.718667	0.695667
9.784	0.671667	0.709667	0.682667	0.758333	0.722333	0.698667
9.951	0.679333	0.714	0.687	0.760667	0.726	0.702
10.118	0.685667	0.717333	0.690333	0.762333	0.729	0.703333
10.284	0.691	0.721667	0.694667	0.764667	0.731	0.705
10.451	0.697333	0.725333	0.698	0.767667	0.734667	0.706
10.618	0.702	0.728667	0.700333	0.769	0.737	0.707
10.784	0.707333	0.732667	0.705	0.77	0.738667	0.708667
10.951	0.712333	0.736	0.709667	0.771333	0.740667	0.709
11.118	0.716	0.737	0.712	0.771667	0.741667	0.71
11.284	0.719667	0.737667	0.713	0.771333	0.745	0.713
11.451	0.723333	0.739	0.713667	0.770667	0.747333	0.713333
11.618	0.727333	0.739667	0.714667	0.77	0.749	0.714
11.784	0.731	0.740667	0.714667	0.769	0.749667	0.713
11.951	0.734333	0.742	0.716333	0.768667	0.748	0.712
12.118	0.737333	0.743333	0.718	0.767	0.746	0.710333
12.284	0.739667	0.743	0.719333	0.765333	0.743333	0.707333
12.451	0.741	0.746	0.720667	0.763667	0.741333	0.705
12.618	0.744	0.747667	0.720667	0.760667	0.738667	0.703
12.784	0.746667	0.749333	0.721333	0.759333	0.736333	0.700333
12.951	0.748333	0.749333	0.72	0.757333	0.734	0.698

## Sheet: MNNG
time	ΔssrA MNNG			WT MNNG
0.118	0.103333	0.103333	0.101667	0.105333	0.109	0.106333
0.284	0.105	0.105	0.102667	0.109333	0.113333	0.109333
0.451	0.106667	0.107	0.104667	0.112667	0.119333	0.115
0.618	0.109333	0.109333	0.107333	0.117	0.126333	0.119333
0.784	0.112	0.111333	0.11	0.121667	0.135333	0.126
0.951	0.114	0.114333	0.113	0.127	0.145333	0.133
1.118	0.117667	0.117333	0.116667	0.133667	0.156	0.140667
1.284	0.121	0.121333	0.120333	0.140333	0.167	0.15
1.451	0.125667	0.125	0.124667	0.148	0.177667	0.159
1.618	0.13	0.13	0.129667	0.155667	0.190333	0.167333
1.784	0.134667	0.135	0.136	0.163333	0.204333	0.182333
1.951	0.140333	0.140667	0.142	0.171667	0.218667	0.189667
2.118	0.146333	0.146667	0.148	0.180333	0.231	0.201667
2.284	0.153	0.153667	0.155667	0.190667	0.245333	0.211
2.451	0.159	0.159333	0.161667	0.200667	0.262	0.222
2.618	0.164667	0.165	0.168667	0.209	0.28	0.234
2.784	0.171333	0.172333	0.176333	0.216667	0.299	0.245667
2.951	0.179667	0.180667	0.184333	0.226333	0.313667	0.261
3.118	0.187	0.188	0.193667	0.236	0.327	0.273667
3.284	0.195667	0.197333	0.204	0.246	0.341	0.287333
3.451	0.206333	0.206	0.212333	0.256	0.355333	0.298667
3.618	0.213667	0.213667	0.220667	0.267	0.368	0.309
3.784	0.221333	0.220667	0.228333	0.277	0.377667	0.319
3.951	0.23	0.229	0.238	0.286333	0.388	0.33
4.118	0.239	0.238333	0.248	0.293667	0.398667	0.340333
4.284	0.249333	0.248333	0.259333	0.300333	0.408333	0.347
4.451	0.260333	0.258667	0.271	0.309667	0.417667	0.354333
4.618	0.271	0.269	0.282	0.317667	0.426667	0.361
4.784	0.282	0.28	0.294	0.323667	0.436333	0.368333
4.951	0.293333	0.291	0.305	0.329667	0.445	0.375
5.118	0.304667	0.301333	0.315333	0.335667	0.453333	0.383333
5.284	0.313	0.310667	0.323667	0.340333	0.462	0.392333
5.451	0.322333	0.318667	0.332333	0.345667	0.470333	0.399
5.618	0.331333	0.327667	0.341667	0.350667	0.479	0.405333
5.784	0.337333	0.335667	0.348	0.356333	0.486333	0.413333
5.951	0.343667	0.341667	0.354	0.361667	0.494667	0.419
6.118	0.349333	0.347333	0.359667	0.366667	0.501667	0.424333
6.284	0.353667	0.353	0.365333	0.371	0.509667	0.430333
6.451	0.358667	0.359	0.371667	0.376	0.515333	0.436
6.618	0.364	0.364333	0.376667	0.381	0.522	0.442
6.784	0.369333	0.369333	0.383333	0.386	0.528	0.447
6.951	0.373667	0.376	0.387667	0.389667	0.533333	0.453333
7.118	0.379	0.380667	0.393333	0.394667	0.539667	0.459333
7.284	0.383	0.386667	0.398333	0.399	0.544	0.462333
7.451	0.388	0.391667	0.403667	0.402667	0.550333	0.468333
7.618	0.392333	0.396667	0.409	0.406667	0.555667	0.473
7.784	0.396	0.402	0.413333	0.409667	0.560667	0.477333
7.951	0.400333	0.407333	0.417	0.414	0.566	0.480667
8.118	0.405	0.412	0.422667	0.418	0.571	0.485333
8.284	0.408333	0.416667	0.426333	0.421667	0.574667	0.488333
8.451	0.412333	0.422	0.430667	0.426333	0.579	0.492667
8.618	0.415333	0.426	0.433667	0.428333	0.582667	0.494333
8.784	0.418667	0.431	0.438333	0.432	0.588333	0.499
8.951	0.422333	0.435	0.441667	0.435	0.592	0.503
9.118	0.424667	0.439667	0.445	0.437333	0.596667	0.505667
9.284	0.427	0.443667	0.449	0.439667	0.599333	0.508333
9.451	0.430333	0.448333	0.451667	0.442	0.603333	0.511
9.618	0.432	0.452667	0.455	0.444667	0.606667	0.513667
9.784	0.436	0.456667	0.459	0.447667	0.61	0.516667
9.951	0.438667	0.460333	0.461333	0.449333	0.612333	0.52
10.118	0.441333	0.462	0.464333	0.451667	0.613667	0.522
10.284	0.442333	0.466333	0.465333	0.453667	0.615667	0.524333
10.451	0.444667	0.469333	0.467	0.456333	0.617	0.527333
10.618	0.445333	0.472	0.469333	0.457333	0.617667	0.529667
10.784	0.447	0.475333	0.471667	0.459333	0.617667	0.532333
10.951	0.45	0.478333	0.473667	0.461667	0.617667	0.537333
11.118	0.450667	0.480333	0.475	0.463333	0.617	0.538
11.284	0.452667	0.483667	0.477667	0.464667	0.617333	0.539333
11.451	0.453333	0.486667	0.477667	0.466667	0.615333	0.539
11.618	0.455667	0.489667	0.48	0.468333	0.614333	0.540333
11.784	0.455667	0.491667	0.481667	0.47	0.612	0.539333
11.951	0.458667	0.494667	0.483	0.471	0.61	0.539
12.118	0.459333	0.497333	0.483667	0.473	0.609	0.54
12.284	0.460667	0.499333	0.485	0.473667	0.607333	0.538
12.451	0.462	0.501667	0.486	0.474667	0.605333	0.537667
12.618	0.463333	0.504667	0.488	0.477	0.603333	0.536667
12.784	0.463667	0.507	0.488333	0.478	0.600667	0.536
12.951	0.464667	0.508667	0.489	0.479	0.598	0.534333
