# Supplementary material for: Alkylative damage of mRNA leads to ribosome stalling and rescue by trans translation in bacteria
Source: eLife journal article supplement (doi:10.7554/elife.61984), 2020-09-17
Supplement: supp [file elife-61984-supp-v1.zip › elife_poa_e61984_Supplementary_file_1.xlsx]

## Sheet: Sheet1
Nucleoside	Precursor mass, m/z	Product ion, m/z	Retention time, minute	Collision Energy, V
A	268.1	136	1.92	18
C	244.1	112	0.48	14
G	284.2	152	2.4	16
U	245.2	152.1	1	14
m1A	282.2	150.1	0.9	16
m6A	282	150	4.08	16
m3C	258.2	126	0.8	8
m7G	298.2	166	1.5	10
m1G	298	166	4.623	10
m6G	298	166	4.84	10
